# Supplementary material
Source: PubMed Central journal article supplement (PMC4470808)
Supplement: NIHMS677528-supplement-01.pdf [file NIHMS677528-supplement-01.pdf]

**Age <30 yrs (n=316)**

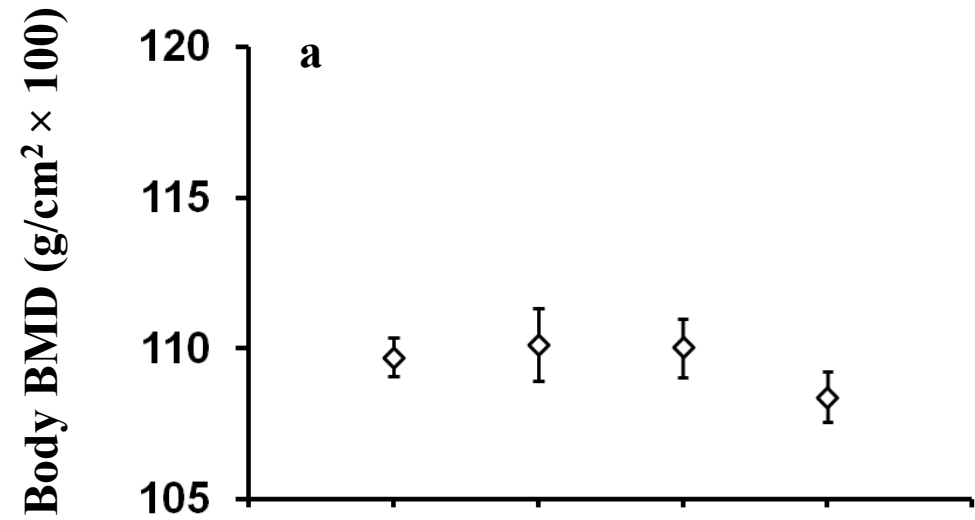

**Age 30 - 40 yrs (n=567)**

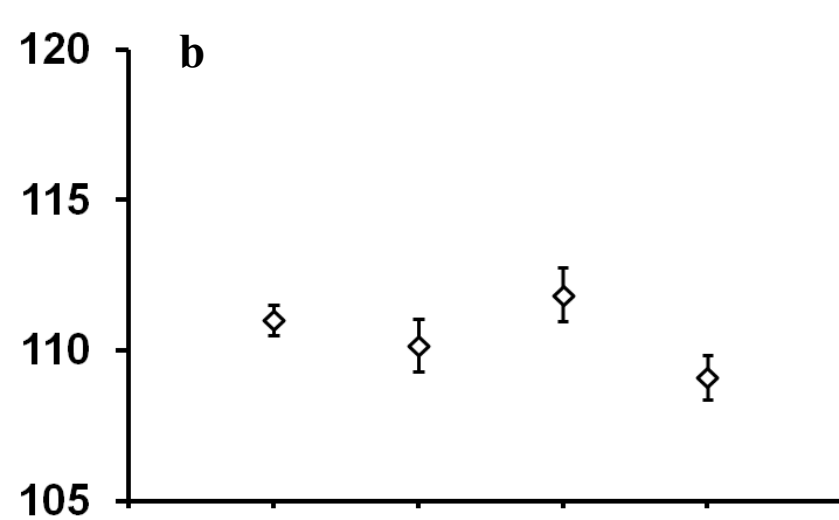

**Age ≥ 40 yrs (n=254)**

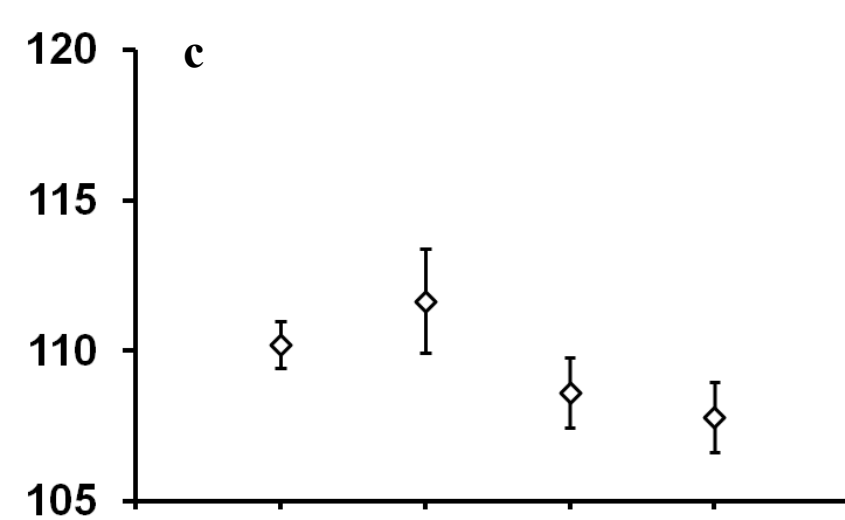

**Body BMD (g/cm<sup>2</sup> × 100)**

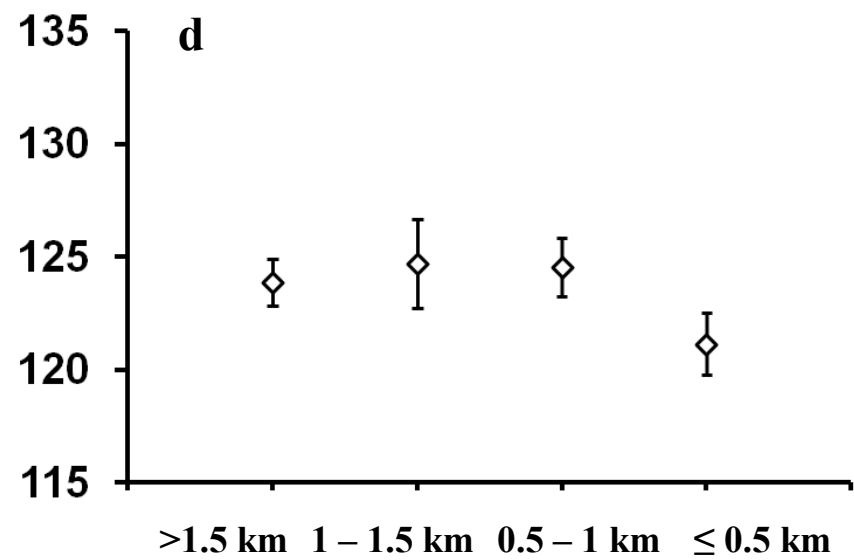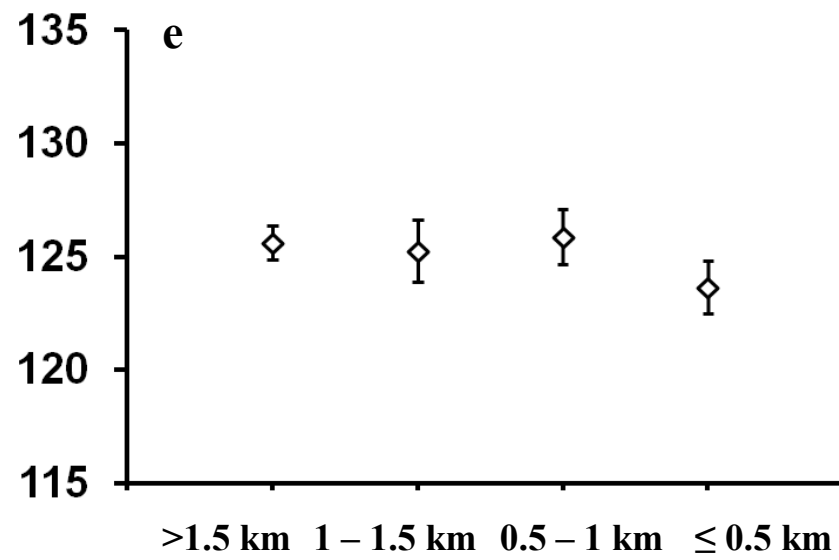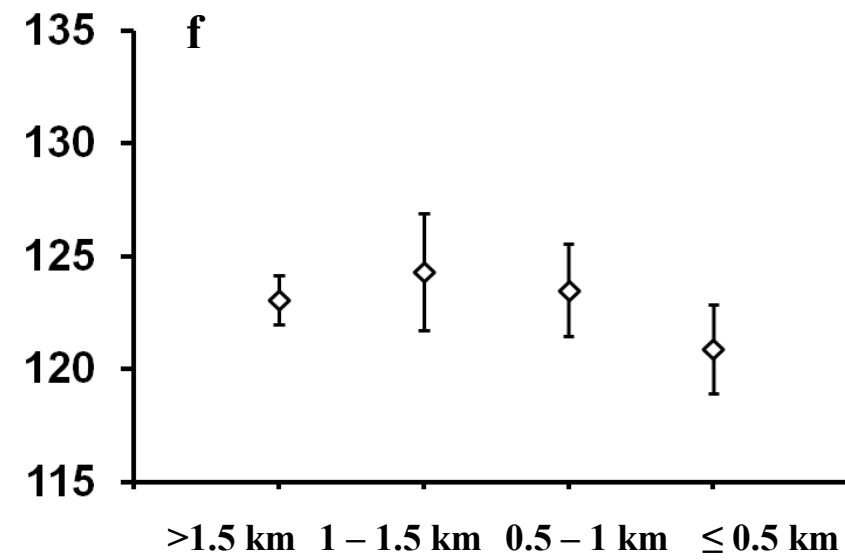

**Distance to the nearest Freeway (km)**

**Males (n=319)**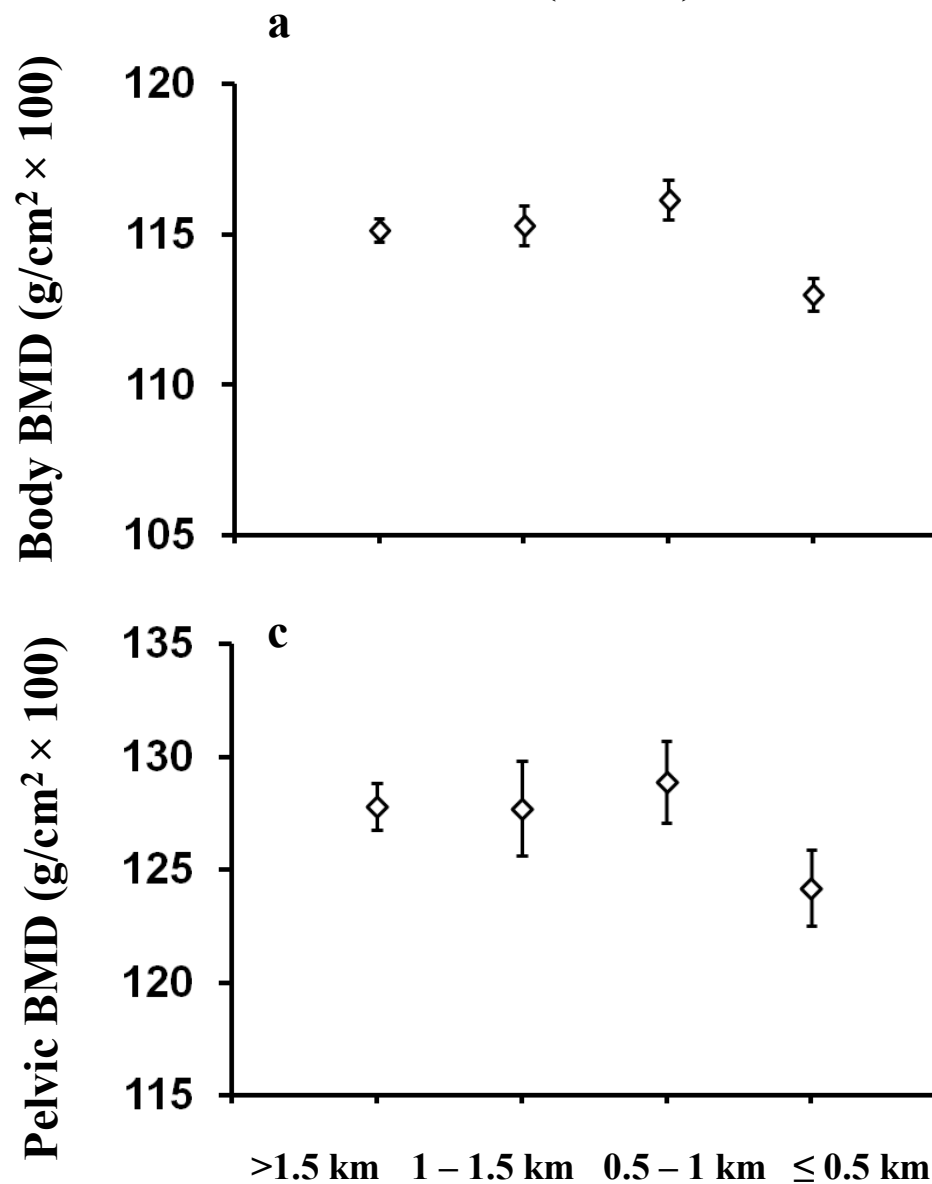**Females (n=818)**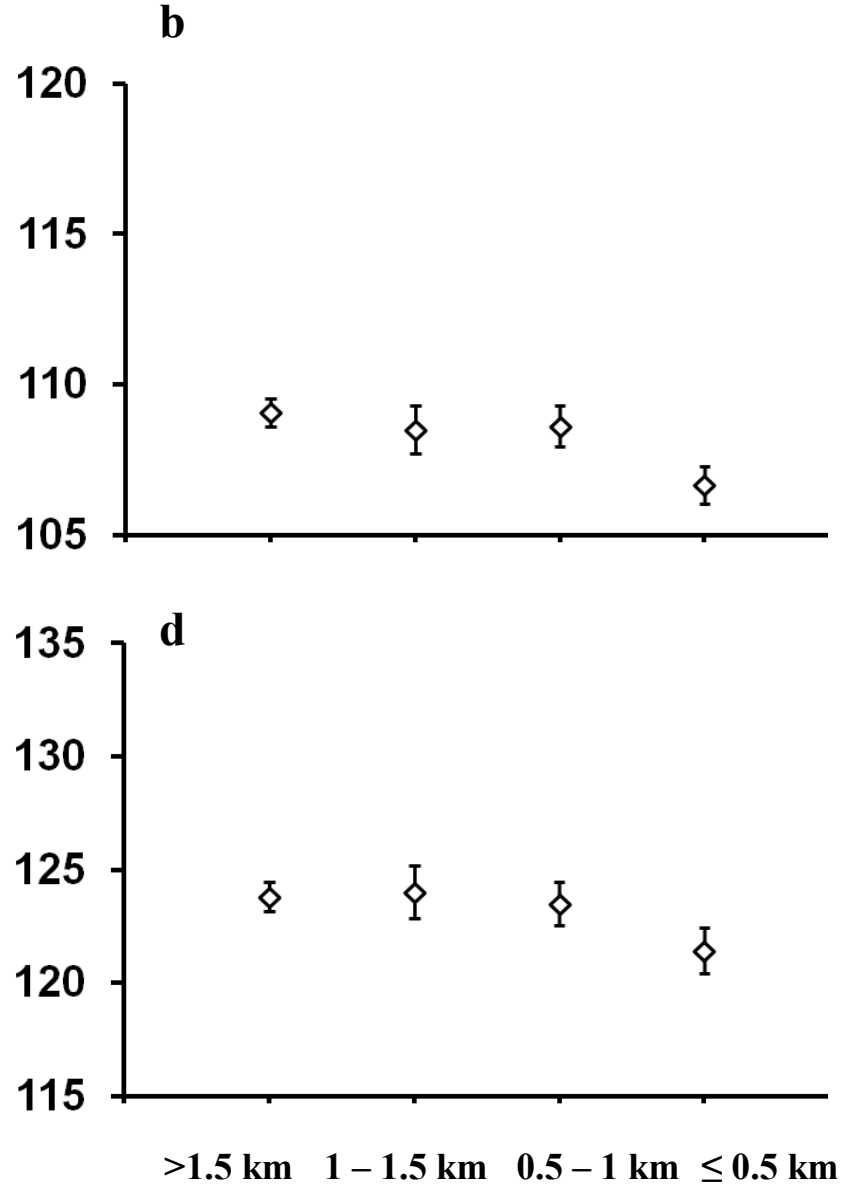**Distance to the Nearest Freeway (km)**

**Normal Weight (n=257)**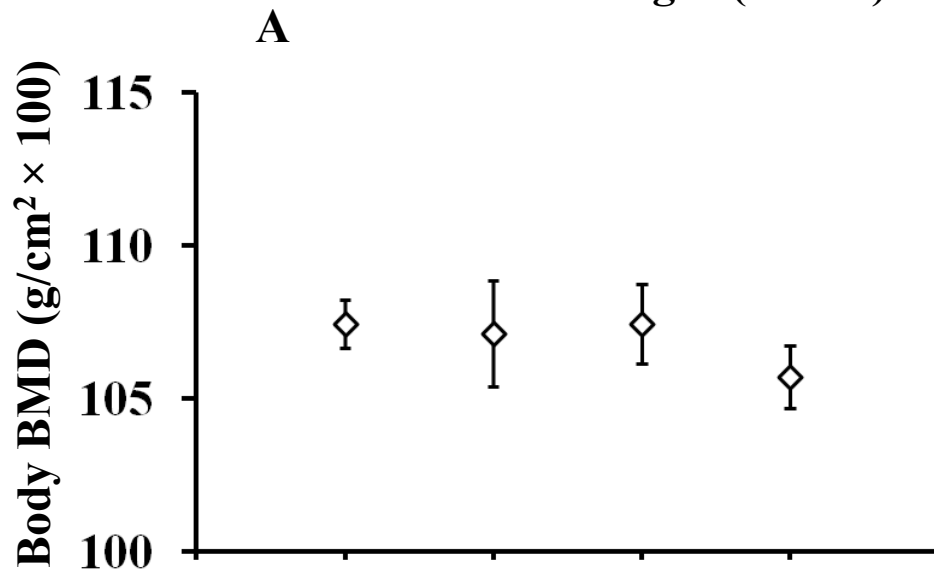**Overweight and Obese (n=916)**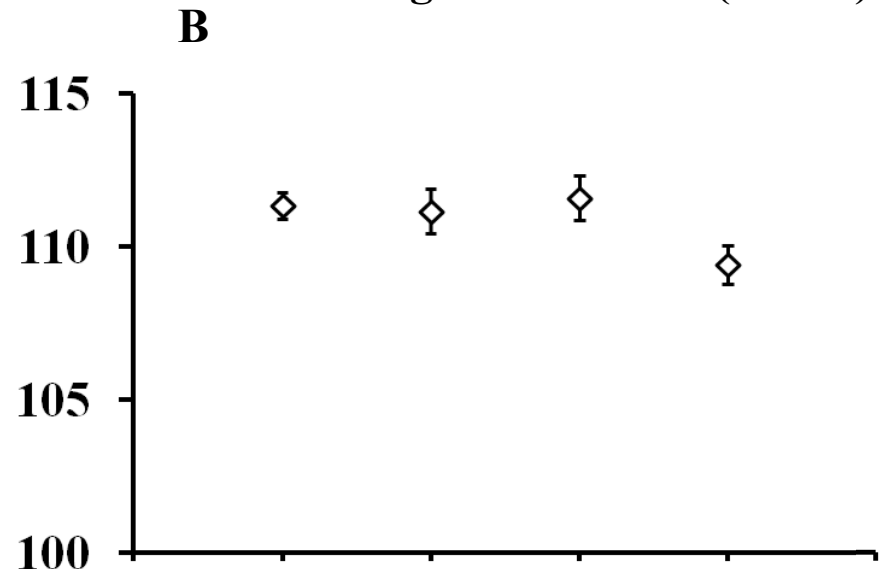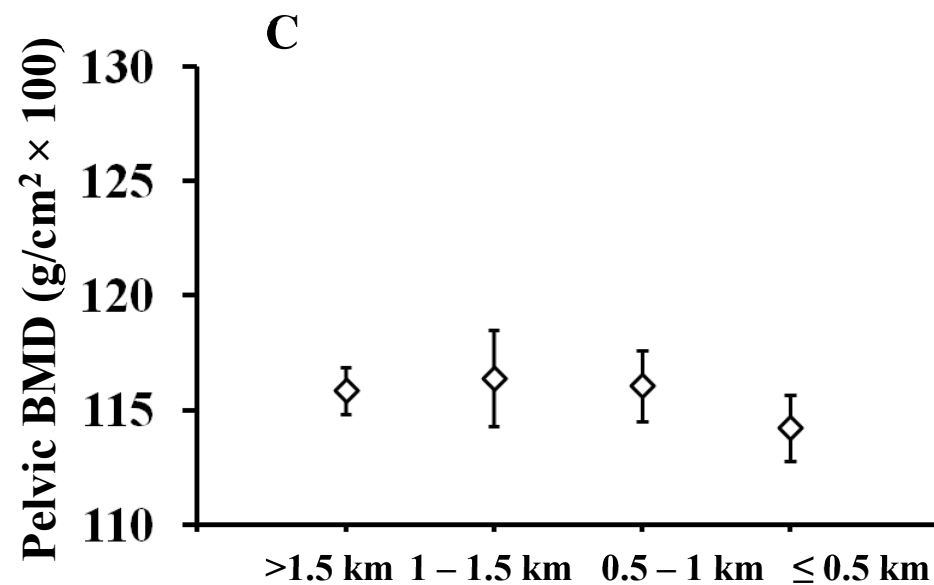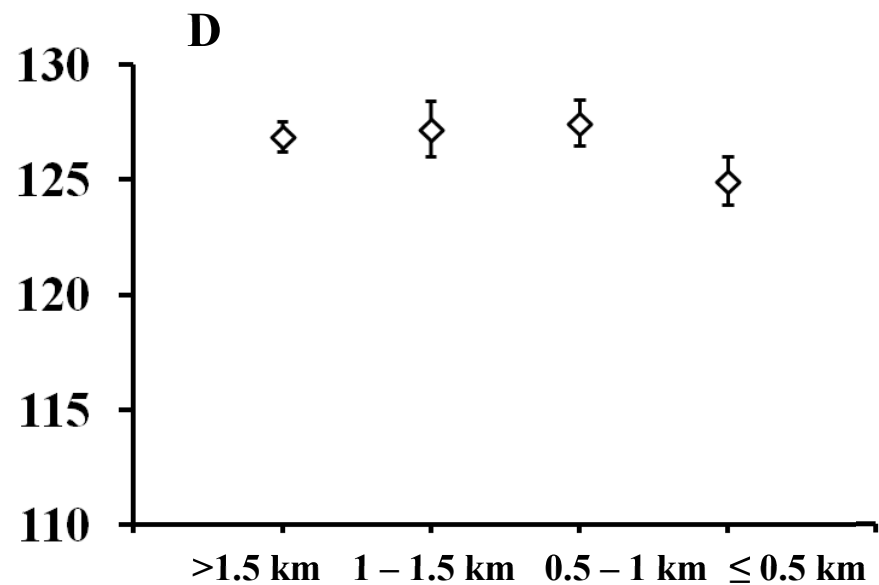**Distance to the Nearest Freeway (km)**
